# Supplementary material for: Food Involvement, Eating Restrictions and Dietary Patterns in Polish Adults: Expected Effects of Their Relationships (LifeStyle Study)
Source: PubMed Central journal article supplement (PMC7230548; doi:10.3390/nu12041200), 2020-04-24

Figure S1: Flow-chart of participants

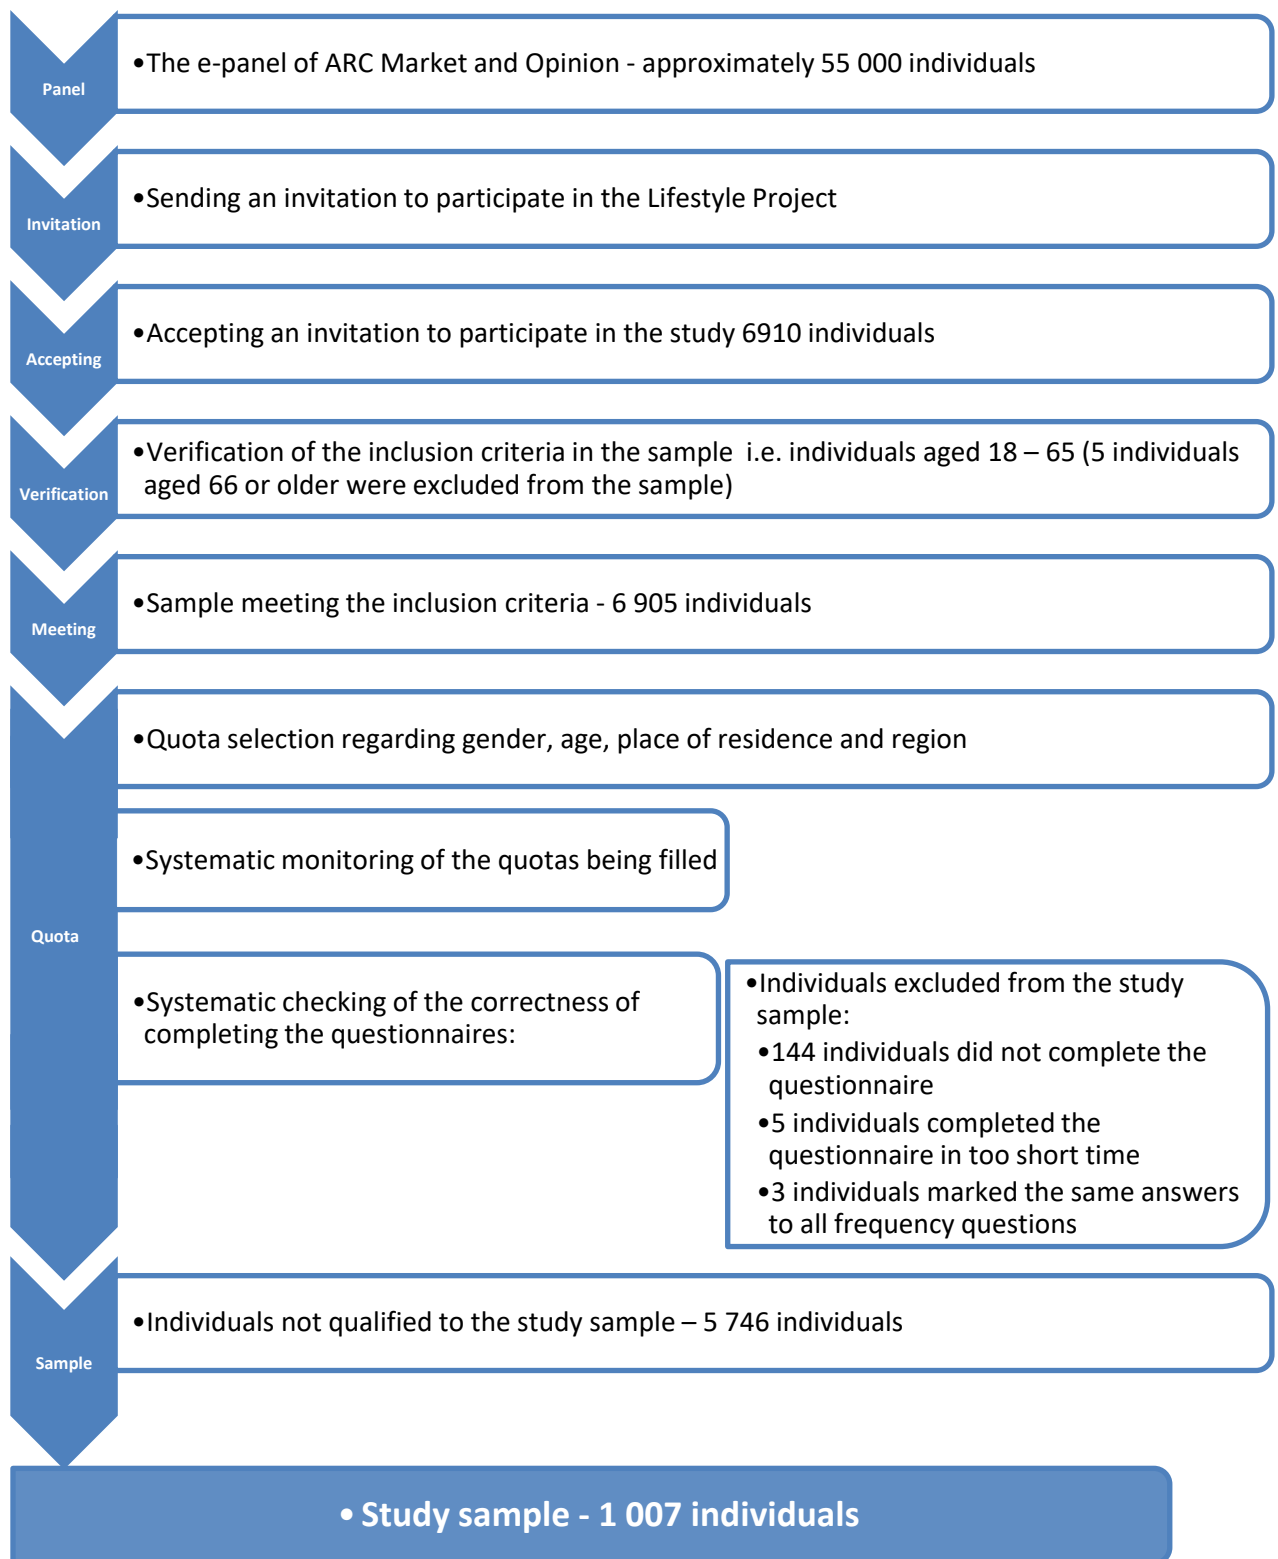

Supplement: nutrients-12-01200-s001.pdf [file nutrients-12-01200-s001.pdf]
